# Correction to: ‘Valid sequential inference on probability forecast performance’

ALEXANDER HENZI and JOHANNA F. ZIEGEL

*Institute of Mathematical Statistics and Actuarial Science, University of Bern,  
 Alpeneggstrasse 22, 3012 Bern, Switzerland*

alexander.henzi@stat.unibe.ch johanna.ziegel@stat.unibe.ch

*Biometrika* (2021), 109, pp. 647–63.

In the paragraph before Proposition 2 of Henzi & Ziegel (2021) it is claimed that

$$e_T = \frac{1}{h} \sum_{k=1}^h \prod_{l \in I_k} E_{p_l, q_l; \lambda_l}(Y_{l+h}), \quad I_k = \{k + hs : s = 0, \dots, \lfloor (T - k)/h \rfloor - 1\},$$

is a nonnegative supermartingale. This is generally not true for  $h > 1$ . As a consequence, Proposition 2 is not correct for  $h > 1$ , and should be adapted as follows.

PROPOSITION 2. *Let  $\tau \in \mathbb{N}$  be a stopping time. Then under the assumptions of Proposition 1,*

$$\mathbb{E}_{\mathbb{Q}}(e_{\tau+h-1}) \leq 1, \quad \mathbb{Q} \in \mathcal{H}_S.$$

The quantity  $p_{t_0} = \min\{1, \inf_{s=1, \dots, t_0} 1/e_s\}$  defined in the last paragraph of § 3 is an anytime-valid  $p$ -value only for  $h = 1$ , but the stopping time  $\tau_{\alpha, h}$  guarantees that  $\mathbb{Q}(\tau_{\alpha, h} < \infty) \leq \alpha$  for  $h > 1, \alpha \in (0, 1)$ , and  $\mathbb{Q} \in \mathcal{H}_S$ , because  $\tau_{\alpha, h} < \infty$  implies  $e_{\tau_{\alpha, h}+h-1} \geq 1/\alpha$ . Hence all empirical results in the article remain valid. An anytime-valid  $p$ -value for  $h > 1$  is given by

$$p_{t_0} = \min \left( 1, \inf_{s=1, \dots, t_0} \left[ \max_{j=s-h+1, \dots, s-1} E_{p_j, q_j; \lambda_j} \{ \mathbb{1}(p_j > q_j) \}^{-1} / e_s \right] \right),$$

since  $p_t \leq \alpha$  for some  $t \in \mathbb{N}$  if and only if  $\tau_{\alpha, h} < \infty$ .

*Proof of Proposition 2.* Recall that the process  $(Y, p_t, q_t, \lambda_t)_{t \in \mathbb{N}}$  is adapted to  $\mathfrak{F} = (\mathcal{F}_t)_{t \in \mathbb{N}}$ . Let  $h > 1$ . For  $k = 1, \dots, h$ , define  $I_k(t) = \{k + hs : s = 0, \dots, \lfloor (t - k)/h \rfloor - 1\}$ ,

$$M_t^{[k]} = \prod_{l \in I_k(t)} E_{p_l, q_l; \lambda_l}(Y_{l+h}), \quad \mathfrak{F}^{[k]} = \left( \mathcal{F}_{\lfloor \frac{t-k}{h} \rfloor h + k} \right)_{t \in \mathbb{N}},$$

with  $\prod_{\emptyset} := 1$  and  $\mathcal{F}_j := \{\Omega, \emptyset\}$  for  $j \leq 0$ . Then  $e_t = \sum_{k=1}^h M_t^{[k]}/h$ . For  $k = 1, \dots, h$ , the process  $(M_t^{[k]})_{t \in \mathbb{N}}$  is a nonnegative supermartingale with respect to  $\mathfrak{F}^{[k]}$  for any  $\mathbb{Q} \in \mathcal{H}_S$ , and therefore satisfies  $\mathbb{E}_{\mathbb{Q}}(M_{\tau^{[k]}}^{[k]}) \leq 1$  for any  $\mathfrak{F}^{[k]}$ -stopping time  $\tau^{[k]}$ . So

$$\mathbb{E}_{\mathbb{Q}} \left( \frac{1}{h} \sum_{\ell=1}^h M_{\tau^{[k]}}^{[\ell]} \right) \leq 1.$$

for  $\mathfrak{F}^{[k]}$ -stopping times  $\tau^{[k]}$ ,  $k = 1, \dots, h$ . If  $\tau$  is an  $\mathfrak{F}$ -stopping time, then

$$\left( \left\lfloor \frac{\tau - k - 1}{h} \right\rfloor + 1 \right) h + k =: f_k(\tau) \in \{\tau, \dots, \tau + h - 1\}$$

is an  $\mathfrak{F}^{[k]}$ -stopping time. To see this, let  $t = k + hs + j$  for  $s \in \mathbb{N}_0, k \in \{1, \dots, k\}, j \in \{0, \dots, h - 1\}$ . Then  $\lfloor (t - k)/h \rfloor h + k = k + hs$ , and  $f_k(\tau) \leq t$  if and only if  $\tau \leq k + hs$ , so

$$\{f_k(\tau) \leq t\} = \{\tau \leq k + hs\} \in \mathcal{F}_{k+hs} = \mathcal{F}_{\lfloor \frac{t-k}{h} \rfloor h + k}.$$

This implies that for any  $\mathfrak{F}$ -stopping time  $\tau$ , we obtain

$$\mathbb{E}_{\mathbb{Q}}(M_{\tau+h-1}) = \mathbb{E}_{\mathbb{Q}} \left( \frac{1}{h} \sum_{k=1}^h M_{f_k(\tau)}^{[k]} \right) \leq 1, \quad \mathbb{Q} \in \mathcal{H}_S,$$

using the fact that  $M_{t+h-1} = \sum_{k=1}^h M_{f_k(t)}^{[k]}/h$  for  $t \in \mathbb{N}$ . □

The following example demonstrates that the statement of Proposition 2 with  $\tau$  instead of  $\tau + h - 1$  is not true. Let  $h = 2, \varepsilon \in (0, 1)$ , and  $\delta \in (0, \varepsilon)$ . Define  $p_1 = \varepsilon - \delta, q_1 = \varepsilon + \delta$ , and  $p_t = q_t = 0.5$  for  $t > 1$ . Let  $S(p, y) = (p - y)^2$ . Then the one-period e-value for  $t = 1$  equals

$$E_{p_1, q_1}^{\pi_{1,1}}(y) = \frac{\pi_{1,1}^y (1 - \pi_{1,1})^{1-y}}{\varepsilon^y (1 - \varepsilon)^{1-y}},$$

with  $\pi_{1,1} \in (\varepsilon, 1]$ , and  $E_{p_t, q_t}^{\pi_{1,t}}(y) \equiv 1$  for  $t > 1$ , which gives

$$e_t = \begin{cases} 1, & t = 1, 2, \\ 0.5E_{p_1, q_1}^{\pi_{1,1}}(Y_3) + 0.5, & t \geq 3. \end{cases}$$

The null hypothesis consists of all distributions  $\mathbb{Q}$  generating the sequence  $(Y_t)_{t \in \mathbb{N}}$  such that  $\mathbb{Q}(Y_3 = 1 | Y_1) \leq \varepsilon$ . Define  $\mathbb{Q}$  as follows. Let  $\mathbb{Q}(Y_1 = 1)$  be arbitrary;  $Y_2, Y_3$  independent of  $Y_1$  with  $Y_2 = Y_3$  almost surely and  $\mathbb{Q}(Y_2 = Y_3 = 1) = p \in (0, \varepsilon]$ ; and  $Y_t$  for  $t > 3$  with arbitrary distribution. Define the stopping time  $\tau = 3Y_2 + 2(1 - Y_2)$ . Then,

$$e_{\tau} = \begin{cases} 1, & Y_2 = 0, \\ 0.5\pi_{1,1}/\varepsilon + 0.5, & Y_2 = 1, \end{cases}$$

so that  $\mathbb{E}_{\mathbb{Q}}(e_{\tau}) > 1$  for  $\pi_{1,1} > \varepsilon$ , since  $\mathbb{Q}(Y_2 = 1) = p > 0$ .

REFERENCES

HENZI, A. & ZIEGEL, J. F. (2021). Valid sequential inference on probability forecast performance. *Biometrika* **109**, 647–63.

[Received on 1 July 2022. Editorial decision on 1 July 2022]
